# Supplementary material for: Social Physical Activity and Sedentary Behaviour as Key Determinants of Humour Expression and Loneliness in Older Adults: A Cross-sectional Study Using Bayesian Variable Selection Approach
Source: Research Square preprint supplement (doi:10.21203/rs.3.rs-7135619/v1), 2025-07-24
Supplement: Supplementary file 1 [file 9e49fce6f9ab4045d36928ef.docx]

Supplemental Table 1. Associations Between Physical Activity Patterns and Humour Styles: A Bayesian Analysis with Variable Selection in females (Inclusion Probability > 0.5)

| Variables | Affiliative Humour | Self-defeating Humour | Self-enhancing Humour | Aggressive Humour |
| --- | --- | --- | --- | --- |
| Age |  | 0.804 |  |  |
| Start_age |  | 0.741 |  |  |
| Sport_years | 0.774 |  | 0.563 |  |
| work_high_MET |  |  |  |  |
| work_moderate_MET |  |  |  |  |
| work_METs |  |  |  |  |
| transportation_METs |  |  | 0.698 | 0.649 |
| leisure_high_MET |  |  |  |  |
| leisure_moderate_MET |  |  |  |  |
| leisure_METs |  |  |  |  |
| Total_METs |  |  |  |  |
| sedentary | 0.629 | 0.868 | 0.575 | 0.881 |
| Past_ex_friends | 0.906 | 0.523 | 0.604 | 0.609 |
| Past_ex_alone | 0.828 |  | 0.864 |  |
| Present_ex_friends |  | 0.549 |  | 0.684 |
| Present_ex_alone |  | 0.553 |  | 0.581 |

Supplemental Table 2. Associations Between Physical Activity Behaviors and Humour Coping Styles: A Bayesian Analysis with Variable Selection in females (Inclusion Probability > 0.5)

| Variables | Self-enhancing Coping | Cooperative Coping | Aggressive Coping | Self-mocking Coping |
| --- | --- | --- | --- | --- |
| Age | 0.732 |  |  |  |
| Start_age |  |  | 0.547 | 0.607 |
| Sport_years | 0.614 | 0.745 |  | 0.506 |
| work_high_MET |  |  |  |  |
| work_moderate_MET |  |  |  |  |
| work_METs |  |  |  |  |
| transportation_METs | 0.571 | 0.715 | 0.571 | 0.641 |
| leisure_high_MET |  |  |  |  |
| leisure_moderate_MET |  |  |  |  |
| leisure_METs |  |  |  |  |
| Total_METs | 0.505 |  | 0.553 |  |
| sedentary | 0.748 | 0.839 | 0.925 | 0.587 |
| Past_ex_friends | 0.792 | 0.692 | 0.537 | 0.790 |
| Past_ex_alone | 0.645 | 0.582 |  |  |
| Present_ex_friends |  |  | 0.782 | 0.547 |
| Present_ex_alone |  |  | 0.545 | 0.581 |

Supplemental Table 3. Associations Between Physical Activity Patterns and Humour Styles: A Bayesian Analysis with Variable Selection in males (Inclusion Probability > 0.5)

| Variables | Affiliative Humour | Self-defeating Humour | Self-enhancing Humour | Aggressive Humour |
| --- | --- | --- | --- | --- |
| Age |  | 0.641 |  | 0.589 |
| Start_age |  |  |  |  |
| Sport_years |  |  | 0.619 |  |
| work_high_MET |  |  |  |  |
| work_moderate_MET |  | 0.621 | 0.597 |  |
| work_METs |  |  |  |  |
| transportation_METs |  |  | 0.717 |  |
| leisure_high_MET |  |  |  |  |
| leisure_moderate_MET |  |  |  |  |
| leisure_METs |  |  |  |  |
| Total_METs |  |  | 0.504 |  |
| sedentary | 0.781 | 0.917 | 0.780 | 0.817 |
| Sex |  |  |  |  |
| Past_ex_friends | 0.867 |  | 0.739 | 0.821 |
| Past_ex_alone |  |  |  |  |
| Present_ex_friends | 0.742 | 0.615 |  |  |
| Present_ex_alone |  | 0.552 |  | 0.761 |

Supplemental Table 4. Associations Between Physical Activity Behaviors and Humour Coping Styles: A Bayesian Analysis with Variable Selection in males (Inclusion Probability > 0.5)

| Variables | Self-enhancing Coping | Cooperative Coping | Aggressive Coping | Self-mocking Coping |
| --- | --- | --- | --- | --- |
| Age |  |  |  |  |
| Start_age |  |  | 0.559 | 0.777 |
| Sport_years | 0.601 |  |  |  |
| work_high_MET |  |  |  |  |
| work_moderate_MET |  | 0.588 |  | 0.564 |
| work_METs |  |  | 0.614 |  |
| transportation_METs | 0.603 | 0.630 |  |  |
| leisure_high_MET |  |  |  |  |
| leisure_moderate_MET |  |  | 0.535 |  |
| leisure_METs |  |  |  |  |
| Total_METs | 0.515 |  | 0.508 |  |
| sedentary | 0.721 | 0.827 | 0.924 | 0.827 |
| Sex |  |  |  |  |
| Past_ex_friends | 0.878 | 0.868 | 0.732 | 0.844 |
| Past_ex_alone |  |  |  |  |
| Present_ex_friends |  | 0.660 |  | 0.552 |
| Present_ex_alone |  |  | 0.550 |  |

Supplemental Table 5. Associations Between Physical Activity Patterns, Humour expressions and Loneliness: A Bayesian Analysis with Variable Selection (Inclusion Probability > 0.5)

| Variables | Loneliness |
| --- | --- |
| Age | 0.731 |
| Total_Affiliative_Humour | 0.883 |
| Total_Self_defeating_Humour | 0.793 |
| Total_Self_enhancing_Humour | 0.666 |
| Total_Aggressive_Humour | 0.588 |
| Total_Self_enhancing_Coping | 0.781 |
| Total_Aggressive_Coping | 0.740 |
| Sex | 0.754 |
| Past_ex_friends | 0.716 |
| Past_ex_alone | 0.615 |
| Present_ex_friends | 0.729 |

Supplemental Table 6. Indirect Effects of Past Exercise Experience with Friends on Loneliness through Humour Styles: Results from Bayesian Structural Equation Modeling

| Path | Estimate | Post.SD | 95% Credible Interval |
| --- | --- | --- | --- |
| via Affiliative humour | -1.171 | 0.120 | [-1.406, -0.936] |
| via Self enhancing humour coping | -0.547 | 0.078 | [-0.700, -0.394] |
| via Aggressive humour coping | -0.063 | 0.042 | [-0.146, 0.020] |
| via Self defeating humour | 0.114 | 0.051 | [0.013, 0.214 ] |

Supplemental Table 7. Indirect Effects of Present Exercise Experience with Friends on Loneliness through Humour Styles: Results from Bayesian Structural Equation Modeling

| Path | Estimate | Post.SD | 95% Credible Interval |
| --- | --- | --- | --- |
| via Affiliative humour | -1.591 | 0.160 | [-1.906, -1.277] |
| via Self enhancing humour coping | -0.659 | 0.104 | [-0.863, -0.455] |
| via Aggressive humour coping | -0.081 | 0.057 | [-0.193, 0.031] |
| via Self defeating humour | 0.087 | 0.067 | [-0.044, 0.218] |
