# Supplementary material for: Social Physical Activity and Sedentary Behaviour as Key Determinants of Humour Expression and Loneliness in Older Adults: A Cross-sectional Study Using Bayesian Variable Selection Approach
Source: Research Square preprint supplement (doi:10.21203/rs.3.rs-7135619/v1), 2025-07-24
Supplement: Supplementary file 2 [file 52a90ed6efd7b1e188804298.pdf]

(a) Affiliative\_Humor

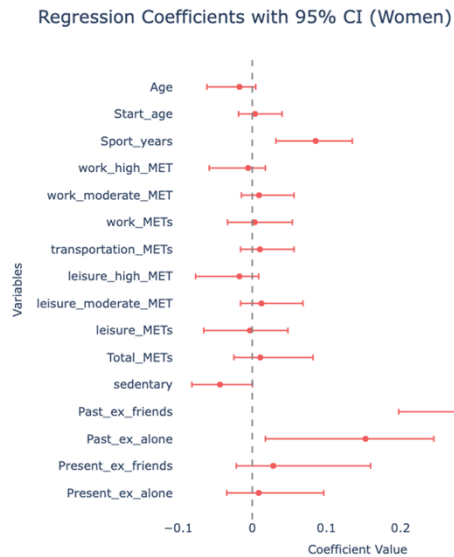

(b) Self\_defeating\_Humor

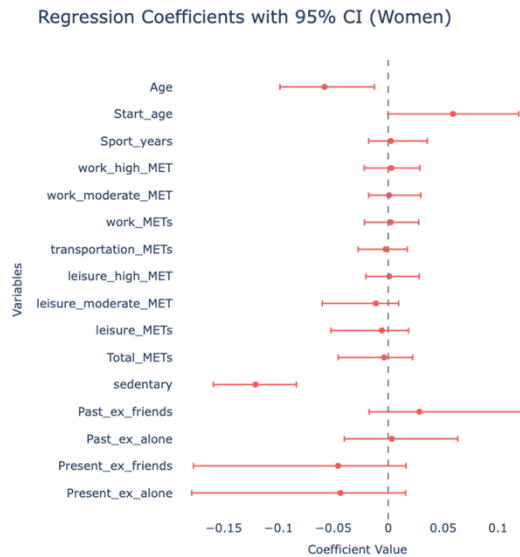

(c) Self\_enhancing\_Humor

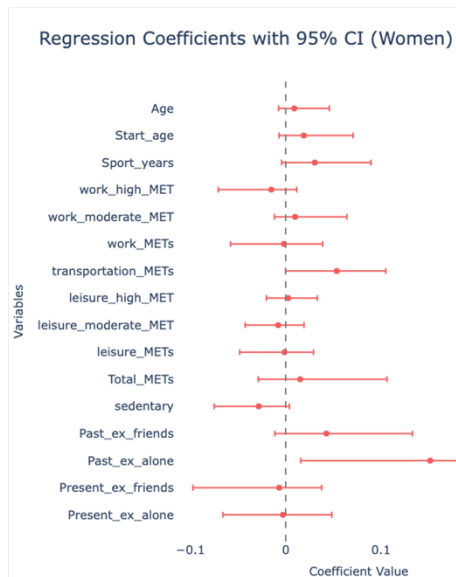

(d) Aggressive\_Humor

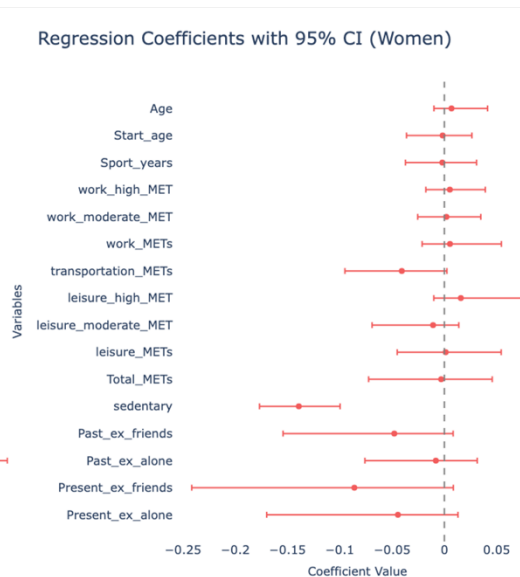

Supplemental Figure 1. Associations Between Physical Activity Variables and Four Humour Styles in females: Regression Coefficients and 95% Credible Interval

(a) Self\_enhancing\_Coping

(b) Cooperative\_Coping

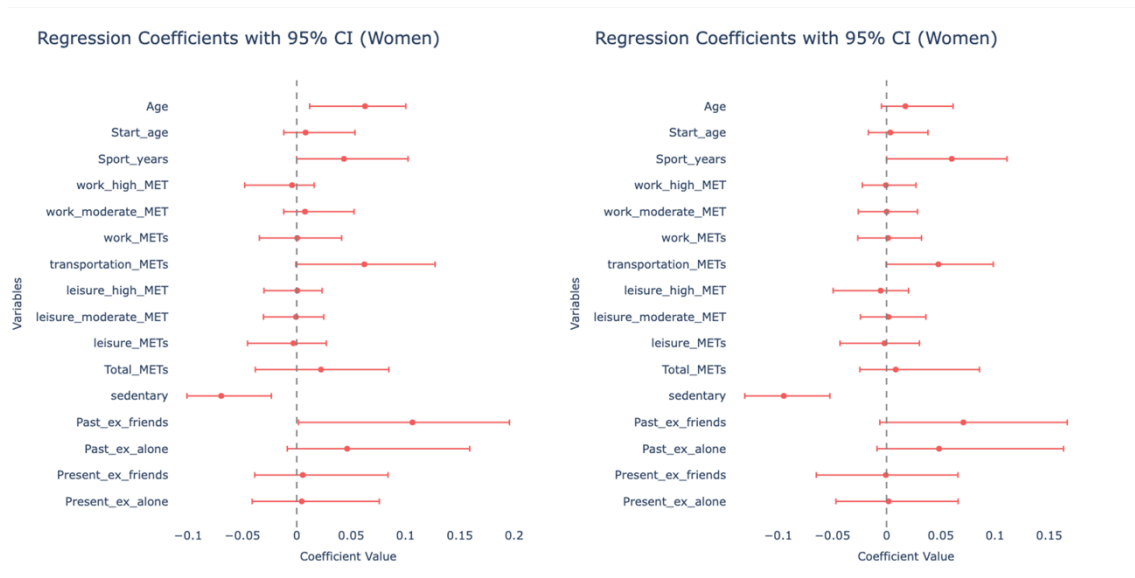

(c) Aggressive\_Coping

(d) Self\_mocking\_Coping

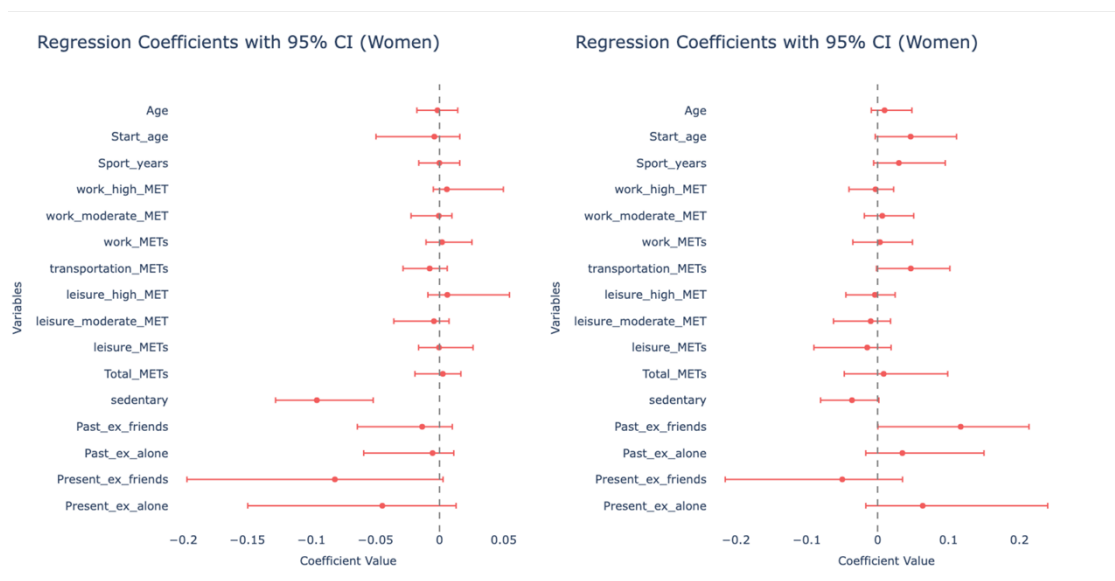

Supplemental Figure 2. Associations Between Physical Activity Variables and Humour Coping Styles in females: Regression Coefficients with 95% Credible Intervals

(a) Affiliative\_Humor

(b) Self\_defeating\_Humor

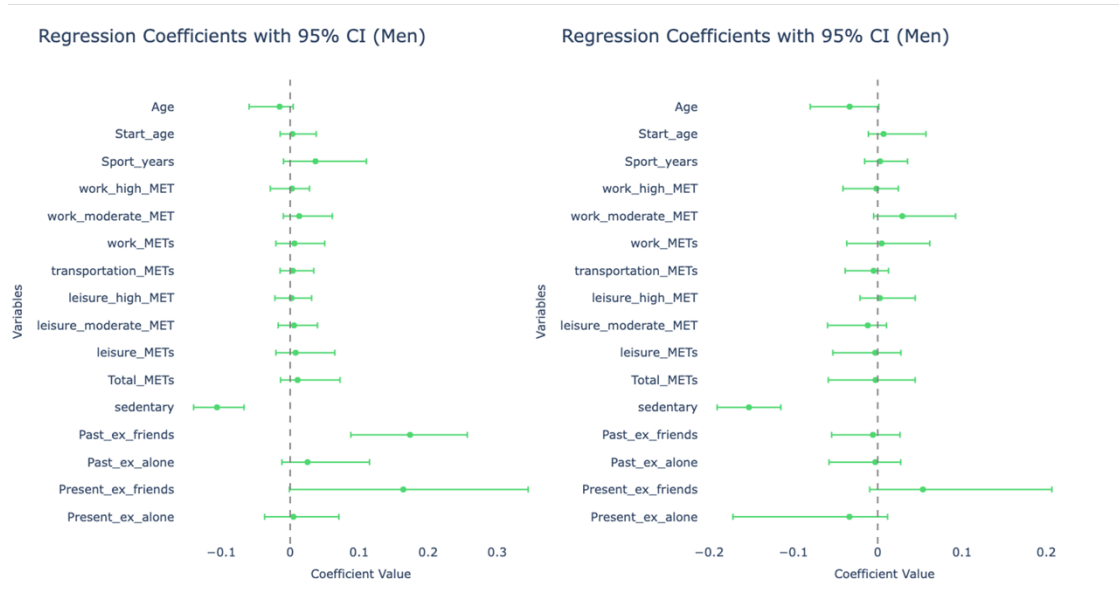

(c) Self\_enhancing\_Humor

(d) Aggressive\_Humor

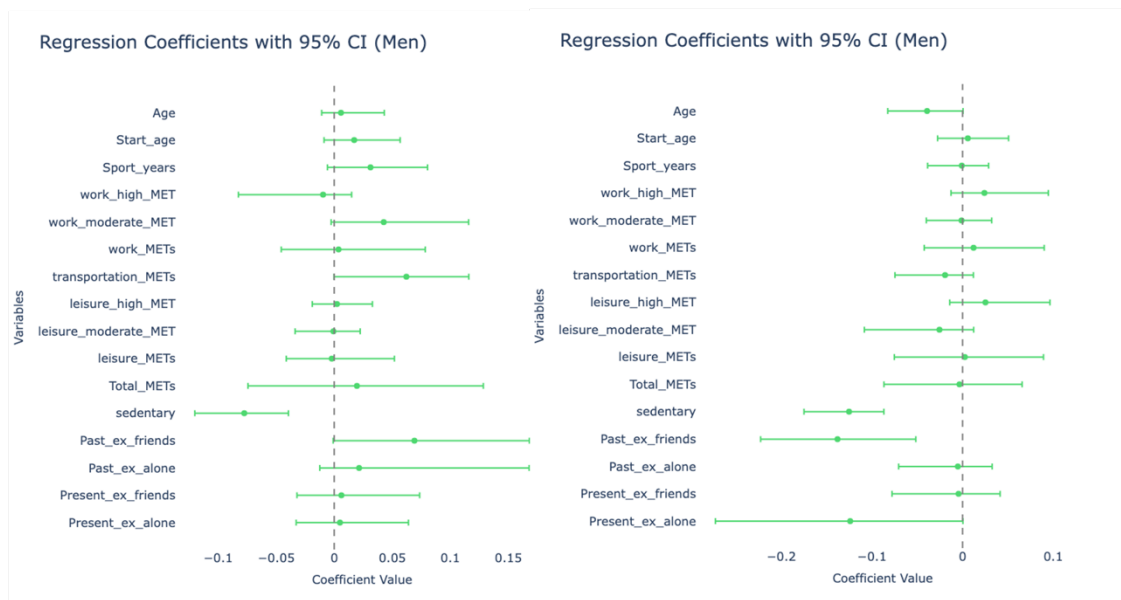

Supplemental Figure 3. Associations Between Physical Activity Variables and Four Humour Styles in males: Regression Coefficients and 95% Credible Interval

(a) Self\_enhancing\_Coping

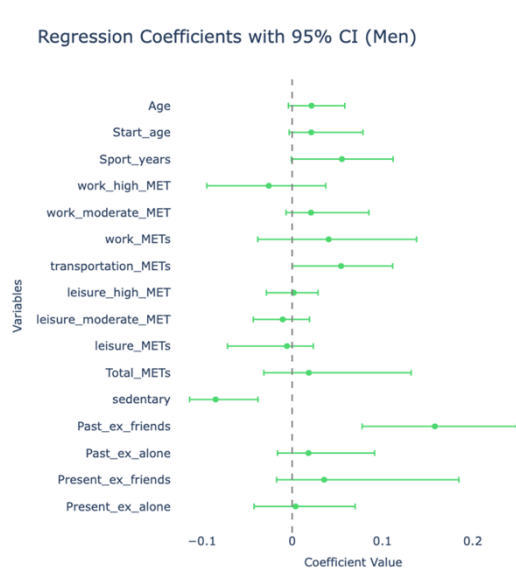

(b) Cooperative\_Coping

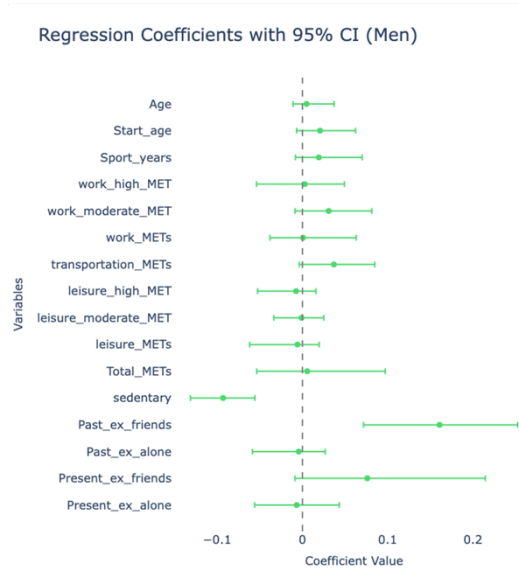

(c) Aggressive\_Coping

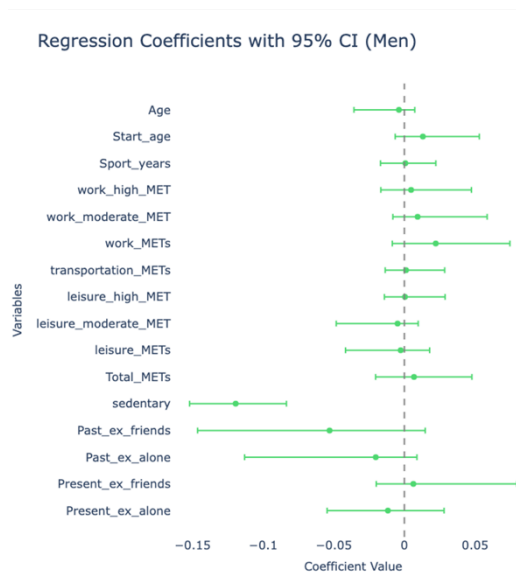

(d) Self\_mocking\_Coping

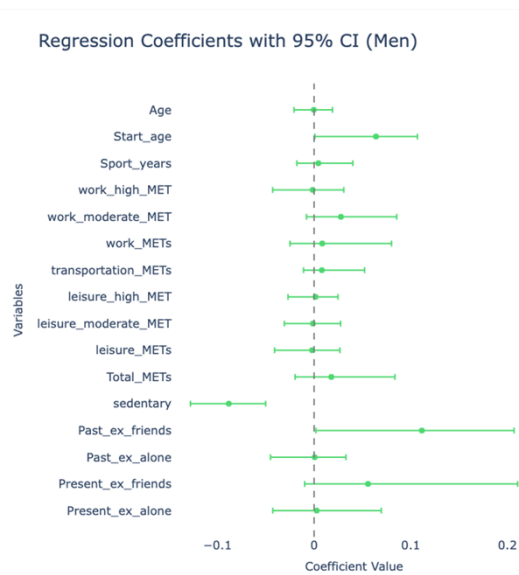

Supplemental Figure 4. Associations Between Physical Activity Variables and Humour Coping Styles in males: Regression Coefficients with 95% Credible Intervals

## Regression Coefficients with 95% CI

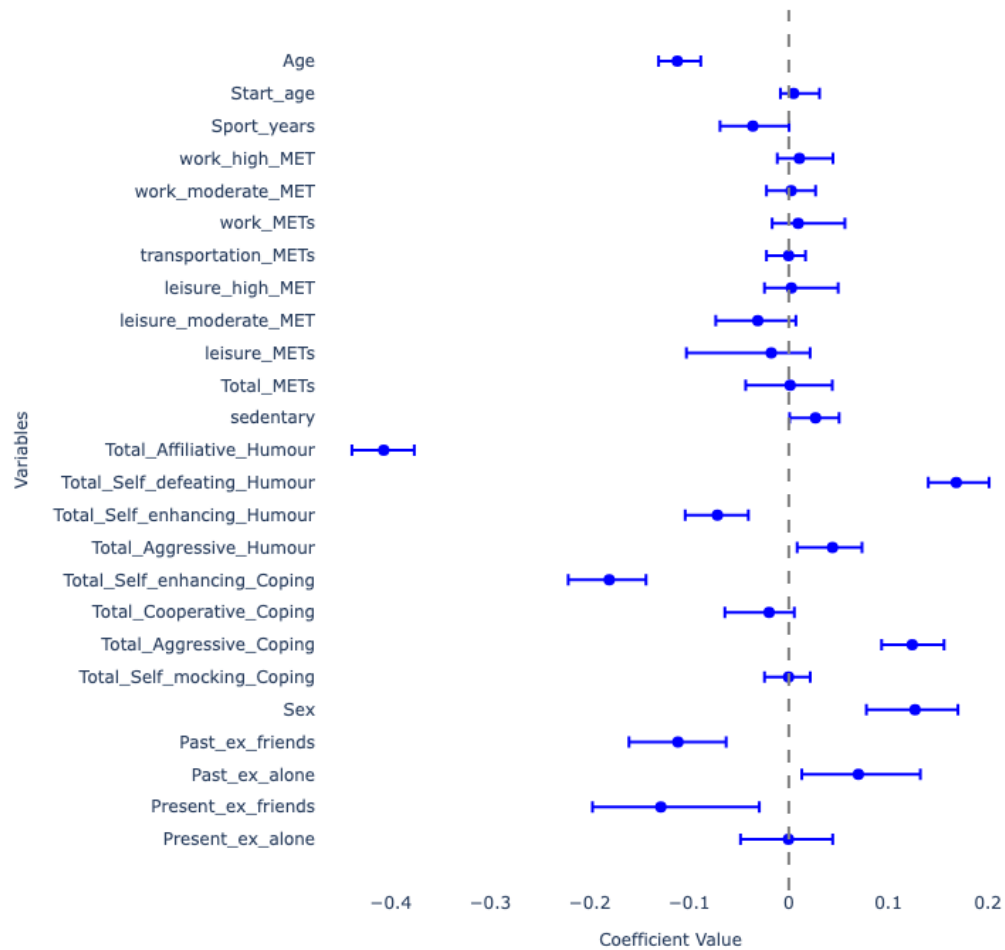

Supplemental Figure 5. Associations among Physical Activity Patterns and Humour expressions and Loneliness: Regression Coefficients with 95% Credible Intervals
